# Supplementary material
Source: publisher figshare collection journal article supplement (https://springernature.figshare.com/ndownloader/files/16694414)

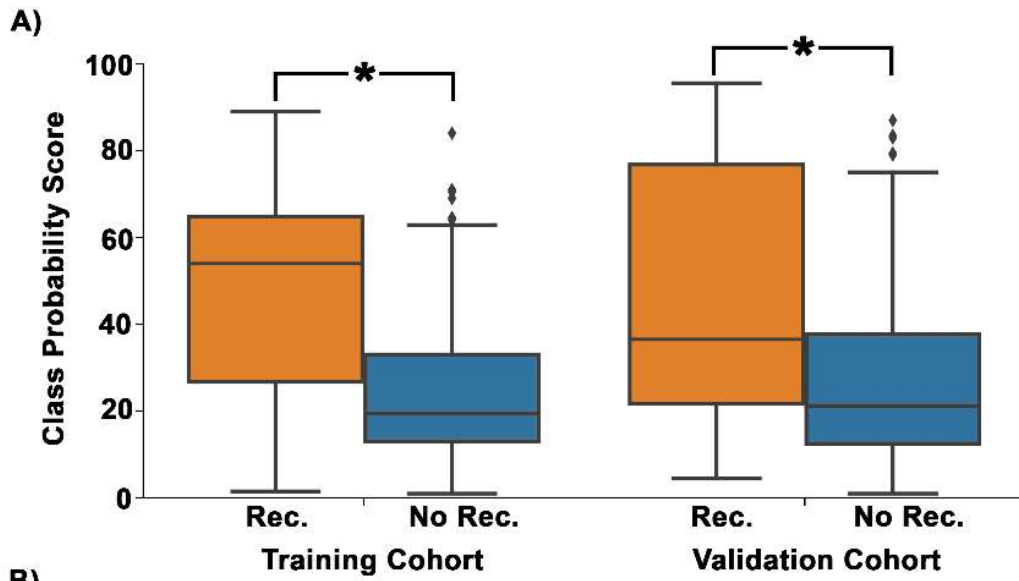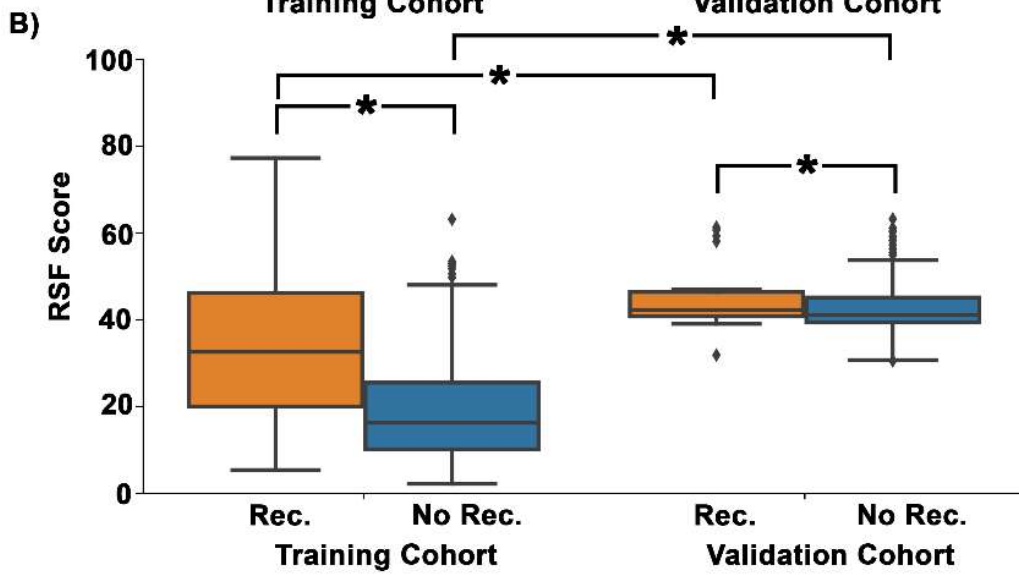

Supplement: Supplementary file [file 16694414]
